# Supplementary material for: A Novel Self-Emulsifying Drug Delivery System (SEDDS) Based on VESIsorb® Formulation Technology Improving the Oral Bioavailability of Cannabidiol in Healthy Subjects
Source: PubMed Central journal article supplement (PMC6720748; doi:10.3390/molecules24162967), 2019-08-16
Supplement: molecules-24-02967-s001.pdf [file molecules-24-02967-s001.pdf]

**Table S1:** MRM settings of the final ESI +-MS/MS method.

| Analyte | Parent ion (m/z) | Daughter ion (m/z) | Dwell time [s] | Cone voltage [V] | Collision energy [V] | Ion transition type |
|---------|------------------|--------------------|----------------|------------------|----------------------|---------------------|
| CBD     | 315.38           | 93.01              | 0.011          | 18               | 24                   | q                   |
|         | 315.38           | 123.00             | 0.011          | 18               | 32                   | q                   |
|         | 315.38           | 193.10             | 0.011          | 18               | 20                   | Q                   |
| IS      | 318.41           | 196.17             | 0.025          | 34               | 22                   | Q                   |
|         | 318.41           | 123.06             | 0.025          | 44               | 32                   | q                   |

LC-MS/MS parameters: WATERS XEVO-TQS micro in ESI + mode; Capillary voltage: 1.9 kV; Source temperature: 400°C; Desolvation gas flow: 1000 L/h; Cone gas flow: 50 L/h; Recorded channels: MS2 scan 50-1000 m/z mass units, 0.1 s scan time. Q: Quantifier ion transition, q: qualifier ion transition
